# Supplementary material
Source: HighWire-hosted journal article supplement (https://bmjopen.bmj.com/content/10/12/e039303)
Supplement: inline-supplementary-material-2 [file inline-supplementary-material-2.pdf]

**Table S2: Search strategy:**

#1 china

#2 asia

#3 'developing country'/exp

#4 'premature labor'/exp

#5 preterm OR pre-term OR 'pre term' OR premature OR pre-mature OR 'pre mature' OR prematuritas OR prematurity OR pre-maturity OR 'pre maturity':ab,ti

#6 labour OR labor OR birth OR child-birth OR childbirth OR 'child birth' OR delivery OR deliveries OR parturition:ab,ti

#7 #5 AND #6

#8 #4 OR #7

#9 pprom:ab,ti

#10 'premature fetus membrane rupture'/exp

#11 ((prelabor OR pre-labor OR 'pre labor' OR preterm OR pre-term OR 'pre term' OR premature OR pre-mature OR 'pre mature') NEAR/3 (ruptur\$ OR membrane\$ OR rom)):ab,ti

#12 #9 OR #10 OR #11

#13 #8 OR #12

#14 #1 OR #2 OR #3

#15 #13 AND #14

#16 #15 AND (2016:py OR 2017:py OR 2018:py)
